# Supplementary material for: Quantifying degradation of the Imja Lake moraine dam with fused InSAR and SAR feature tracking time series
Source: Copernicus journal article supplement (doi:10.5194/egusphere-2024-3196), 2024-11-08
Supplement: Supplementary file 1 [file egusphere-2024-3196-supplement.pdf]

## Supplementary Material

### Quantifying degradation of the Imja Lake moraine dam with fused InSAR and SAR feature tracking time series

George Brencher, Scott T. Henderson, David E. Shean

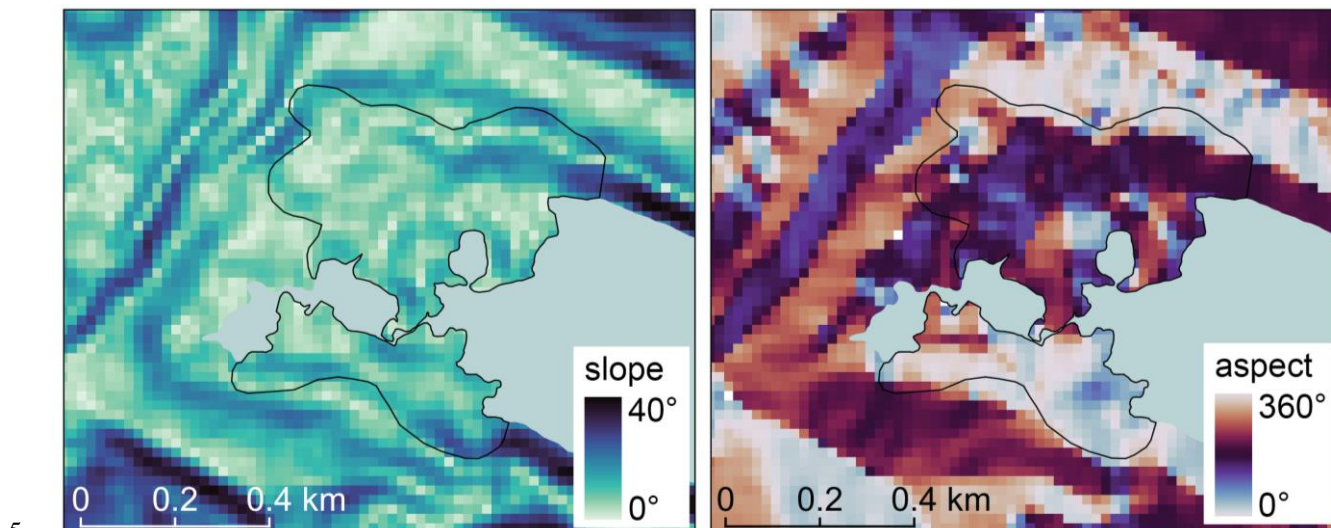

Supplemental Fig. 1. Slope (A) and aspect (B) of the Imja Lake moraine dam from the COP30 composite digital elevation model prepared from TSX/TDX scenes acquired between 2011 and 2015 (European Space Agency, 2022).

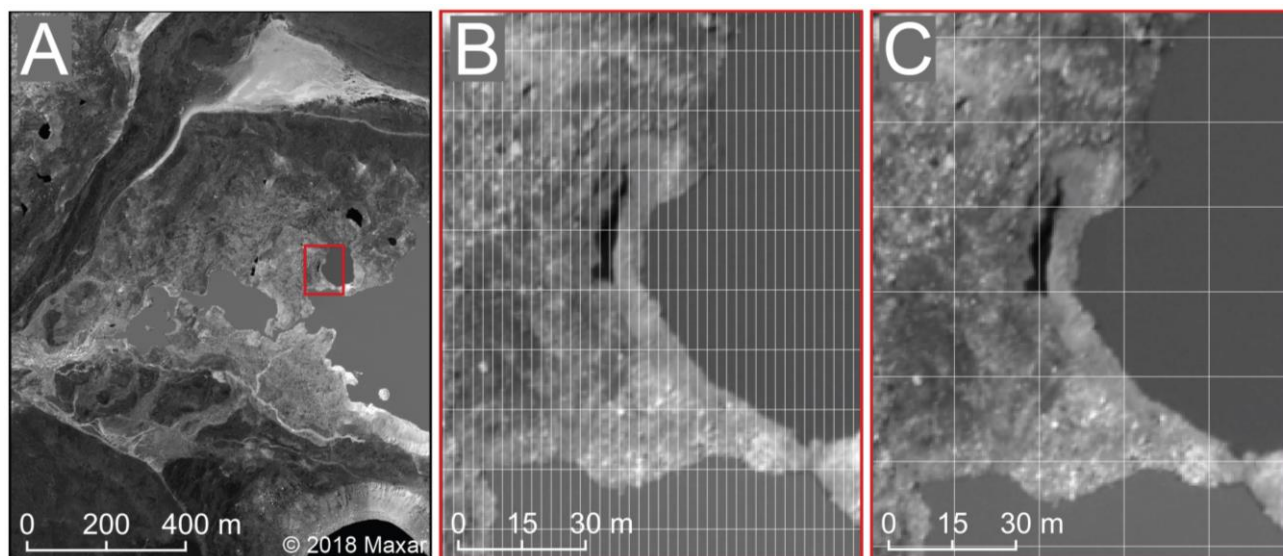

Supplemental Fig. 2. Resolution of Sentinel-1 products over the Imja Lake moraine dam. (A) WorldView-1 panchromatic orthoimage from June 19, 2018 with 0.53-m ground sample distance. (B) Detail of pond and lake margin denoted by red box in A, with 14.1 by 2.3 m grid overlaid showing native Sentinel-1 single-look complex (SLC) azimuth and range resolution, respectively. (C) Same as B, with 20 by 20 m grid showing the resolution of our combined interferometric synthetic aperture radar (InSAR) and feature tracking product.
